# Supplementary material for: B12-containing volleyball-like molecule for hydrogen storage
Source: Royal Society of Chemistry journal article supplement (doi:10.1039/c9ra10491g), 2020-01-01
Supplement: c9ra10491g1.pdf [file c9ra10491g1.pdf]

*Electronic Supplementary Information*

## **B<sub>12</sub>-containing Volleyball-like Molecule for Hydrogen Storage**

Jing-Jing Guo,<sup>a</sup> Hui-Yan Zhao,<sup>a</sup> Jing Wang,<sup>a</sup> and Ying Liu \*<sup>a,b</sup>

<sup>a</sup> Department of Physics and Hebei Advanced Thin Film Laboratory, Hebei Normal University, Shijiazhuang

050024, Hebei, China

<sup>b</sup> National Key Laboratory for Materials Simulation and Design, Beijing 100083, China

E-mail: [yliu@hebtu.edu.cn](mailto:yliu@hebtu.edu.cn)

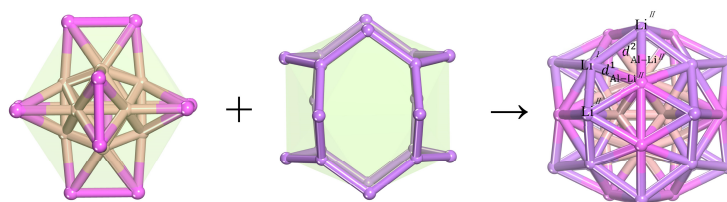

**Fig. S1.** The construction process of the core-shell volleyball-like B<sub>12</sub>@Li<sub>20</sub>Al<sub>12</sub>. Here, 12 Al atoms (magenta) are located above the center of 12 triangles of the B<sub>12</sub> icosahedron (pink), then every 2 Al atoms connect with 8 Li atoms (purple). The shell structure is like a volleyball consisting of six Al<sub>2</sub>Li<sub>8</sub> subunits.

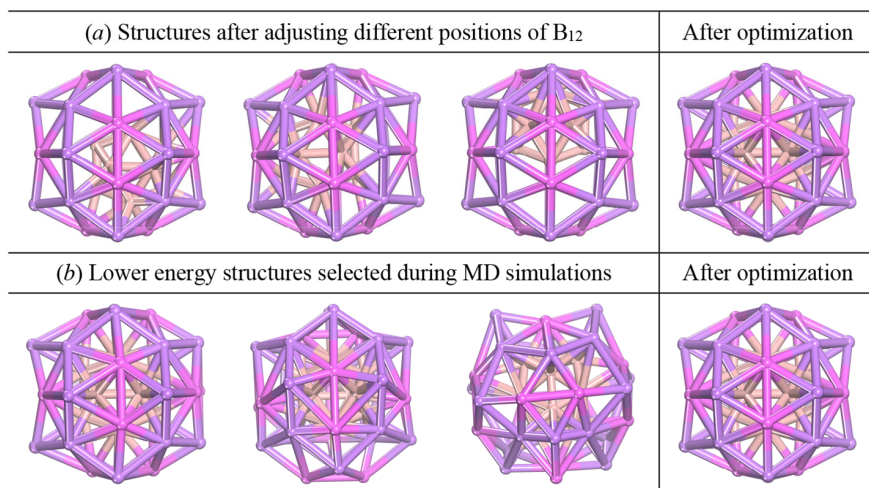

**Fig. S2.** (a) The optimized structures of the core-adjusted B<sub>12</sub>@Li<sub>20</sub>Al<sub>12</sub>, and (b) low-energy B<sub>12</sub>@Li<sub>20</sub>Al<sub>12</sub> during MD simulations.

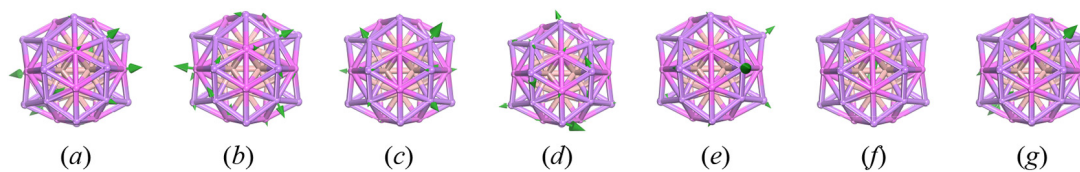

**Fig. S3.** Several vibrational frequency modes of the core-shell B<sub>12</sub>@Li<sub>20</sub>Al<sub>12</sub>. To be specific, (a)-(e) correspond to the vibrational frequency modes for the peaks of 91.94 cm<sup>-1</sup>, 157.87 cm<sup>-1</sup>, 280.66 cm<sup>-1</sup>, 355.68 cm<sup>-1</sup> and 558.82 cm<sup>-1</sup> respectively; (f)-(g) correspond to the vibrational frequency modes for the highest and lowest frequencies, respectively.



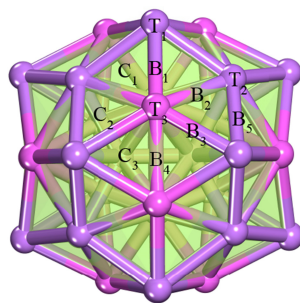

**Fig. S6.** Several possible locations of adsorbed  $H_2$  molecules. Specifically,  $T_1$  and  $T_2$  symbolize the top locations above the two types of Li atoms,  $T_3$  symbolizes the top location above the Al atom;  $B_1$ ,  $B_2$  and  $B_3$  symbolize the bridge locations above the Al-Li bonds,  $B_4$  and  $B_5$  symbolize the bridge locations above the Li-Li bond and Al-Al bond;  $C_1$  and  $C_2$  symbolize the top locations above the center of triangles composed of Al-Li-Li,  $C_3$  symbolizes the top locations above the center of triangle composed of Li-Al-Al.

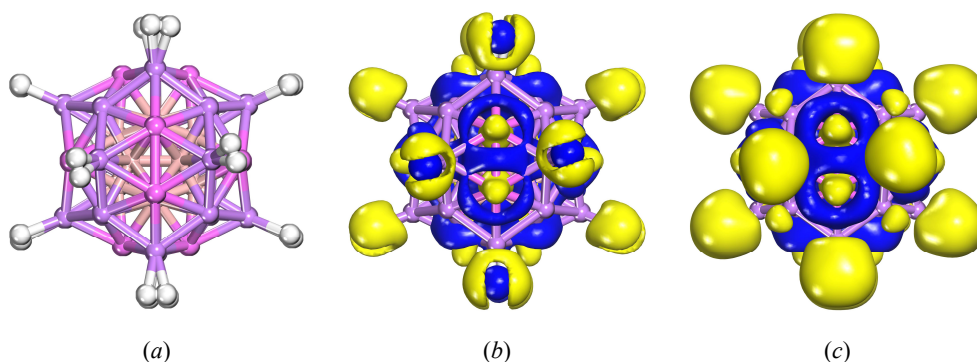

**Fig. S7.** The configuration of core-shell volleyball-like  $B_{12}@Li_{20}Al_{12}$  with 12  $H_2$  adsorbed on the 12  $Li^{II}$  atoms ( $B_{12}@Li_{20}Al_{12}-12H_2$ ) for part (a) and corresponding deformation electron density with different isovalues for part (b) and part (c). To be specific, the isovalue is  $0.2 e/\text{\AA}^3$  for part (b) and  $0.1 e/\text{\AA}^3$  for part (c).

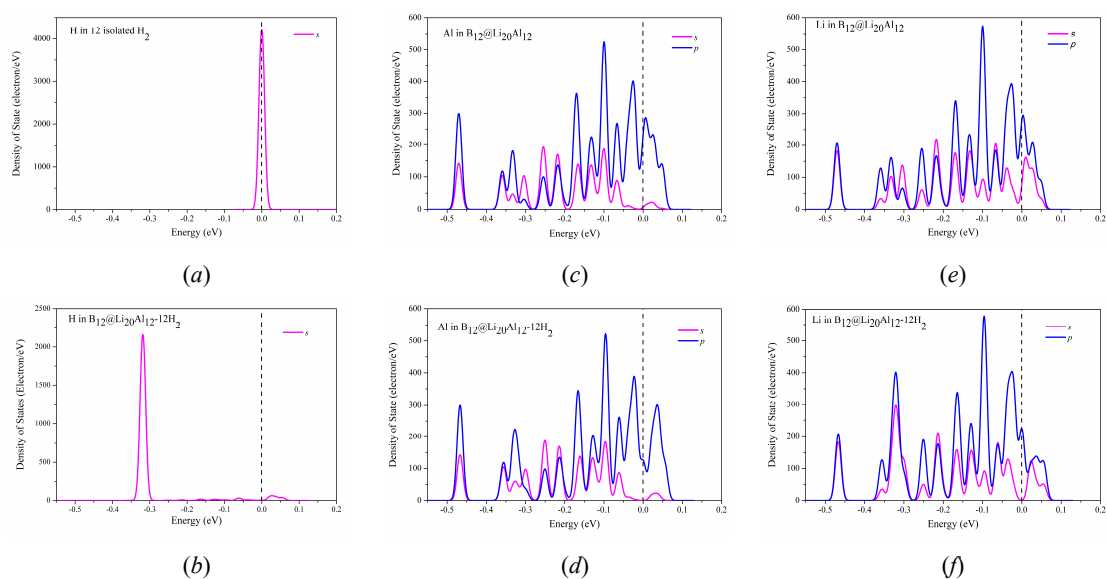

**Fig. S8.** Partial density of states (PDOS) of H atoms both in 12 isolated  $H_2$  molecules (a) and in  $B_{12}@Li_{20}Al_{12}-12H_2$  (b), Al atoms both in  $B_{12}@Li_{20}Al_{12}$  (c) and in  $B_{12}@Li_{20}Al_{12}-12H_2$  (d) and Li atoms both in  $B_{12}@Li_{20}Al_{12}$  (e) and in  $B_{12}@Li_{20}Al_{12}-12H_2$  (f). The black dotted line is the Fermi level.

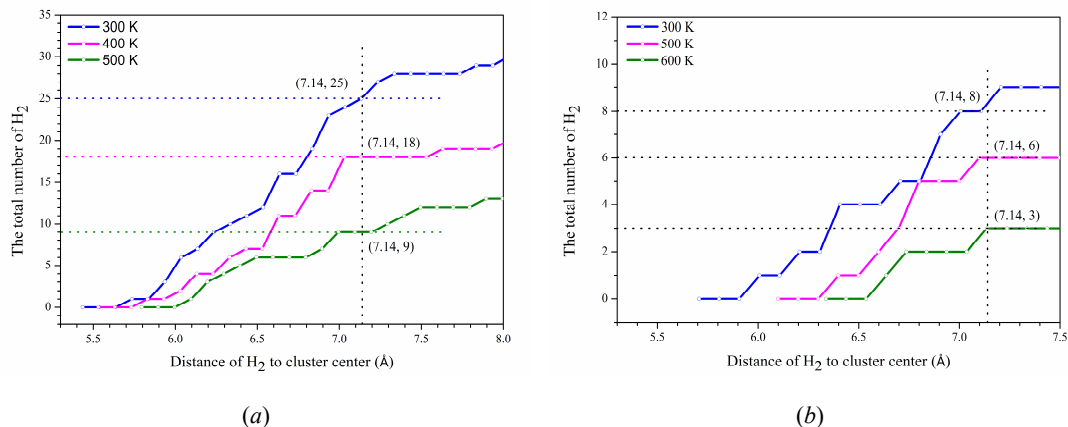

**Fig. S9.** The statistical results of distances of H<sub>2</sub> molecules to the cluster of the B<sub>12</sub>@Li<sub>20</sub>Al<sub>12</sub> with 58 H<sub>2</sub> (two layers of absorbed H<sub>2</sub> molecules) absorbed for part (a) and 12 H<sub>2</sub> (the first layer of absorbed H<sub>2</sub> molecules) absorbed for part (b). We take the distance of 7.14 Å as the farthest distance of the absorbed H<sub>2</sub> molecules to the cluster center. We also listed the numbers of absorbed H<sub>2</sub> molecules at different temperatures during molecular dynamics simulations.

**Table S1.** The average distance of all types of connections between different atoms for the B<sub>12</sub>@Li<sub>20</sub>Al<sub>12</sub>.

| Average distance (Å) |            |              |                 |             |             |               |                    |                    |
|----------------------|------------|--------------|-----------------|-------------|-------------|---------------|--------------------|--------------------|
| $d_{B-B}$            | $d_{B-Al}$ | $d_{B-Li^I}$ | $d_{B-Li^{II}}$ | $d_{Al-Al}$ | $d_{Li-Li}$ | $d_{Al-Li^I}$ | $d_{Al-Li^{II}}^1$ | $d_{Al-Li^{II}}^2$ |
| 1.88                 | 2.46       | 2.45         | 2.47            | 2.63        | 2.60        | 2.58          | 2.60               | 2.58               |

**Table S2.** The charge partitioning of the core-shell B<sub>12</sub>@Li<sub>20</sub>Al<sub>12</sub> by Hirshfeld analysis.

| Charge partitioning (e) |       |                 |                  |
|-------------------------|-------|-----------------|------------------|
| B                       | Al    | Li <sup>I</sup> | Li <sup>II</sup> |
| -0.08                   | -0.06 | 0.01            | 0.14             |

**Table S3.** The average adsorption energy ( $E_b$ ) of per metal atom for the B<sub>12</sub>@Li<sub>20</sub>Al<sub>12</sub> and B<sub>80</sub>M<sub>12</sub> (M= Li, Na, Mg, K, Ca and Sc).

| Molecule   | B <sub>12</sub> @Li <sub>20</sub> Al <sub>12</sub> | B <sub>80</sub> Li <sub>12</sub> | B <sub>80</sub> Na <sub>12</sub> | B <sub>80</sub> Mg <sub>12</sub> | B <sub>80</sub> K <sub>12</sub> | B <sub>80</sub> Ca <sub>12</sub> | B <sub>80</sub> Sc <sub>12</sub> |
|------------|----------------------------------------------------|----------------------------------|----------------------------------|----------------------------------|---------------------------------|----------------------------------|----------------------------------|
| $E_b$ (eV) | 2.78                                               | 2.77                             | 1.77                             | 1.33                             | 1.70                            | 2.31                             | 4.06                             |

**Table S4.** The distance of H<sub>2</sub> to the nearest metal atoms ( $d_{H-M}$ ), adsorption energies ( $E_{ad}$ ) and the desorption temperature ( $T_d$ ) of H<sub>2</sub> molecule on the eleven specific adsorption locations. The specific meanings for the symbols of eleven specific adsorption locations have already been explained in Fig. S6.

| Adsorption locations | T <sub>1</sub> | T <sub>2</sub> | T <sub>3</sub> | B <sub>1</sub> | B <sub>2</sub> | B <sub>3</sub> | B <sub>4</sub> | B <sub>5</sub> | C <sub>1</sub> | C <sub>2</sub> | C <sub>3</sub> |
|----------------------|----------------|----------------|----------------|----------------|----------------|----------------|----------------|----------------|----------------|----------------|----------------|
| $d_{H-M}$ (Å)        | 1.95           | 3.04           | 3.71           | -              | -              | -              | -              | -              | -              | -              | -              |
| $E_{ad}$ (eV)        | -0.32          | -0.11          | -0.12          | -0.13          | -0.13          | -0.14          | -0.13          | -0.14          | -0.14          | -0.16          | -0.16          |
| $T_d$ (K)            | 408            | 140            | 153            | 166            | 166            | 179            | 166            | 179            | 179            | 204            | 204            |

**Table S5.** The specific coordinates of every atom for the B<sub>12</sub>@Li<sub>20</sub>Al<sub>12</sub>.

| Atom | Coordinates (Å) |        |        |
|------|-----------------|--------|--------|
|      | X               | Y      | Z      |
| B    | -0.155          | -0.226 | 1.771  |
| B    | -1.657          | -0.192 | 0.657  |
| B    | 1.189           | 0.855  | 1.033  |
| B    | 0.462           | 1.633  | -0.577 |
| B    | -1.189          | -0.856 | -1.034 |
| B    | 0.154           | 0.226  | -1.772 |
| B    | -0.463          | -1.634 | 0.576  |
| B    | -0.603          | 1.399  | 0.946  |
| B    | 0.603           | -1.399 | -0.947 |
| B    | 1.657           | 0.191  | -0.659 |
| B    | -1.292          | 0.994  | -0.751 |
| B    | 1.292           | -0.995 | 0.750  |
| Li   | -0.365          | -1.718 | -3.169 |
| Li   | 0.361           | 1.718  | 3.174  |
| Li   | -1.208          | 3.408  | -0.322 |
| Li   | -3.503          | -0.044 | -0.955 |
| Li   | 1.926           | 1.733  | -2.543 |
| Li   | 3.505           | 0.038  | 0.958  |
| Li   | 1.213           | -3.416 | 0.326  |
| Li   | -1.938          | -1.737 | 2.550  |
| Li   | 2.817           | 2.081  | 2.419  |
| Li   | -0.309          | -0.560 | 4.211  |
| Li   | 0.314           | 0.569  | -4.210 |
| Li   | 3.037           | -2.351 | 1.843  |
| Li   | -1.488          | 3.287  | 2.266  |
| Li   | 1.487           | -3.291 | -2.263 |
| Li   | 3.939           | 0.393  | -1.582 |
| Li   | -3.035          | 2.364  | -1.840 |
| Li   | -2.821          | -2.092 | -2.420 |
| Li   | 1.152           | 3.887  | -1.326 |
| Li   | -1.150          | -3.890 | 1.322  |
| Li   | -3.941          | -0.391 | 1.589  |
| Al   | 2.030           | -0.818 | -2.879 |
| Al   | -2.033          | 0.816  | 2.879  |
| Al   | 0.865           | 3.302  | 1.205  |
| Al   | 0.547           | -2.443 | 2.615  |
| Al   | -0.864          | -3.304 | -1.202 |
| Al   | -1.986          | 0.280  | -3.016 |
| Al   | -0.548          | 2.445  | -2.617 |
| Al   | 1.982           | -0.277 | 3.020  |
| Al   | -2.834          | -2.253 | 0.187  |

|    |        |        |        |
|----|--------|--------|--------|
| Al | 2.833  | 2.254  | -0.186 |
| Al | -3.025 | 1.880  | 0.691  |
| Al | 3.024  | -1.881 | -0.690 |

---
